# Supplementary material for: Screening of multidrug-resistant coliforms from fruit juice and their significant correlations with the developmental deformities of Artemia salina (Brine shrimp)
Source: Research Square preprint supplement (doi:10.21203/rs.3.rs-6737003/v1), 2025-06-03
Supplement: Supplementary file 1 [file 43e4f0be288e6cf018af7ab7.docx]

**Screening of multidrug-resistant coliforms from fruit juice and their significant correlations with the developmental deformities of Artemia salina (Brine shrimp)**

Md. Nazmul Haque1, Afrin Priya Talukder2, Shaila Shaimun Diba3, Md. Salah Uddin1, Md. Abu Saleh*1, Shahriar Zaman1, Md. Akhtar-E-Ekram1*,

1Department of Genetic Engineering and Biotechnology, University of Rajshahi, Rajshahi-6205, Bangladesh;

2Department of Applied Biosciences, Macquarie University, NSW-2109, Sydney, Australia; afrinpriya.talukder@students.mq.edu.au (A.P.T.)

3Department of Oceanography, Faculty of Marine Sciences and Fisheries, University of Chittagong-4331, Bangladesh; shaimunshaila.97@gmail.com (S.S.D.)

***Correspondence: saleh@ru.ac.bd (M.A.S.); ekram_2012@ru.ac.bd (M.A.E.E);**


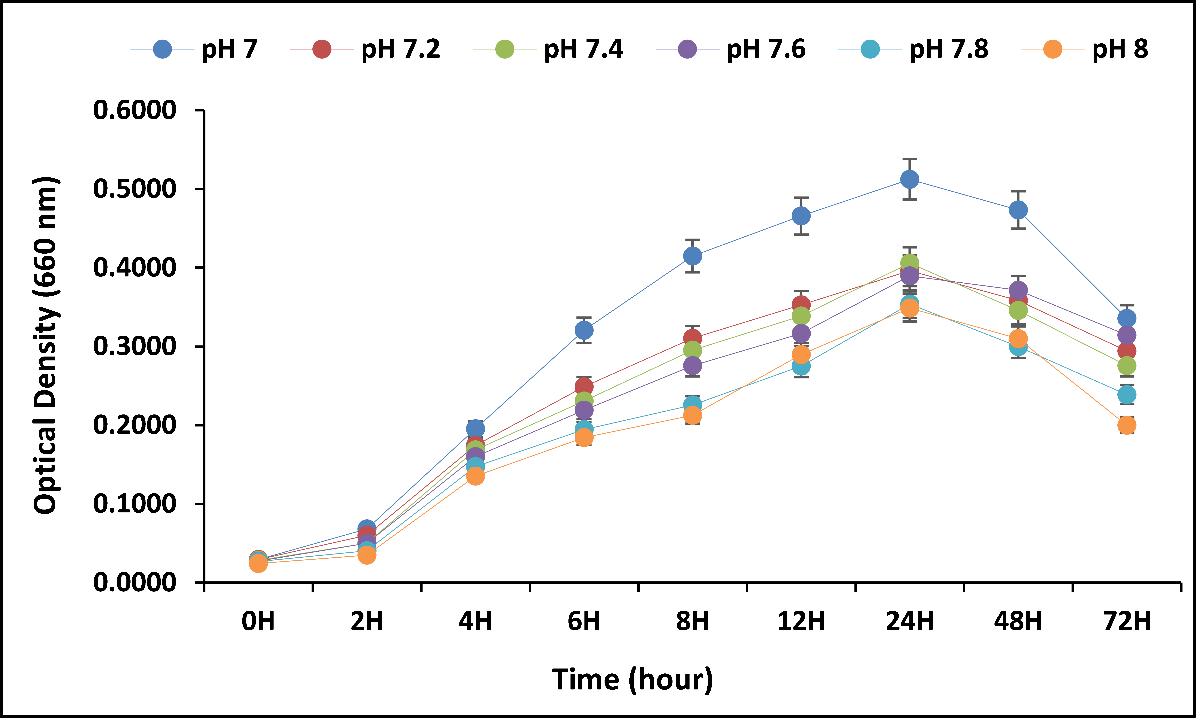


**Fig. S1.** Effect of optimum pH level on the growth of *Acinetobacter* sp. up to 72 hours of incubation period


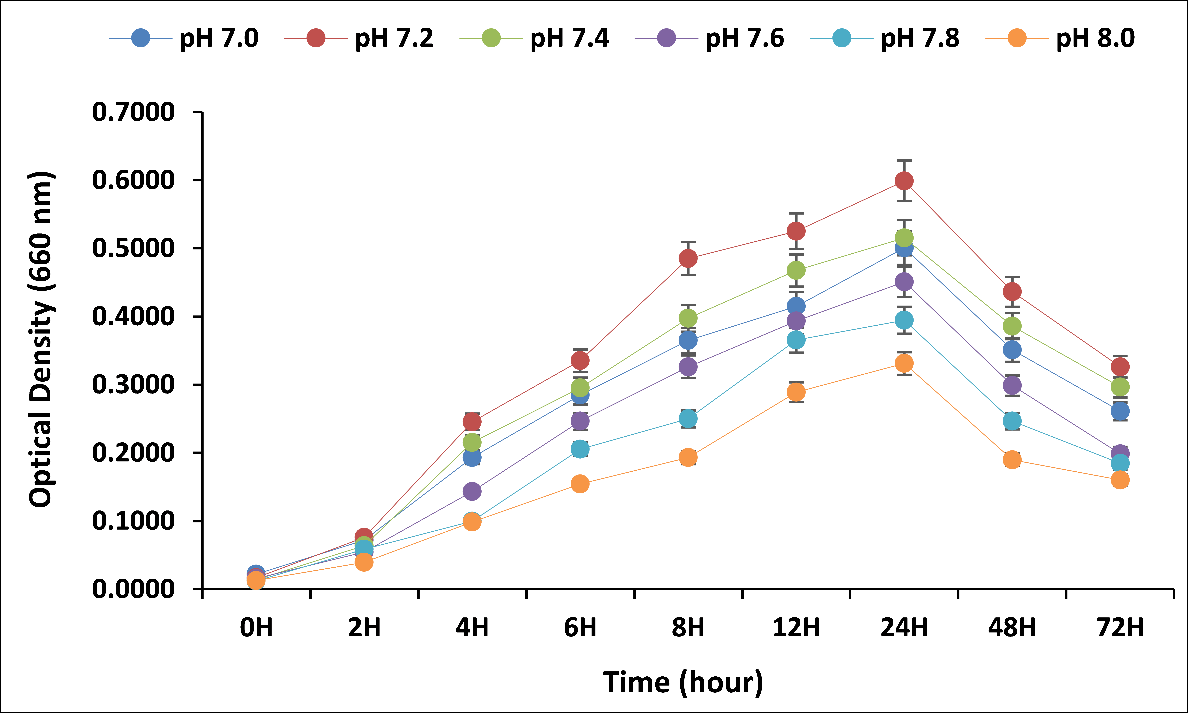


**Fig. S2.** Effect of optimum pH level on the growth of *Klebsiella* sp. up to 72 hours of incubation period


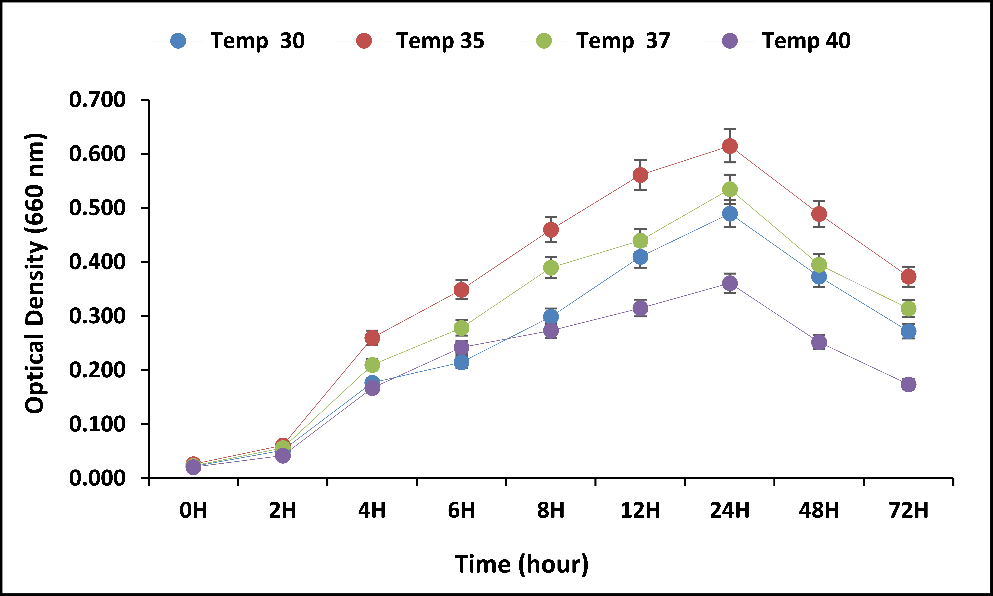


**Fig. S3.** Effect of temperature variations on the growth of *Acinetobacter* sp. up to 72 hours of incubation period


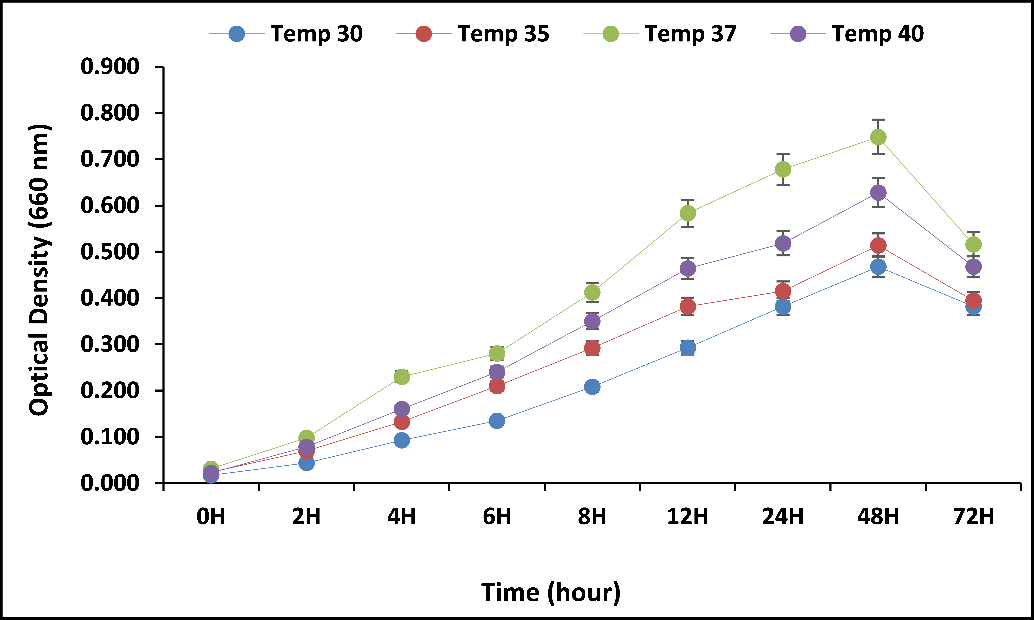


**Fig. S4.** Effect of temperature variations on the growth of *Klebsiella* sp. up to 72 hours of incubation period


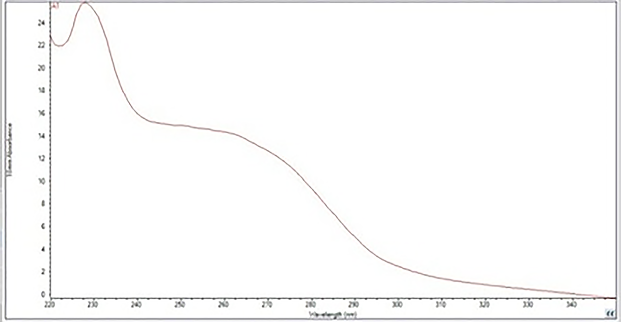

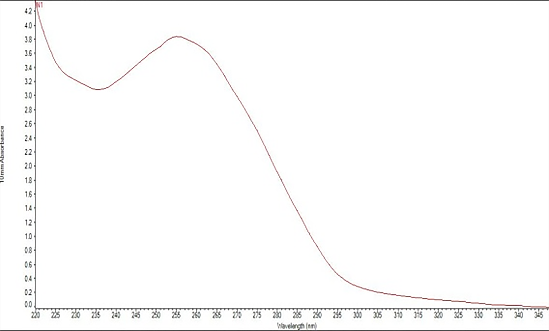


**Fig. S5.** DNA quantification analysis of *Acinetobacter* sp. **Fig. S6.** DNA quantification analysis of *Klebsiella* sp.


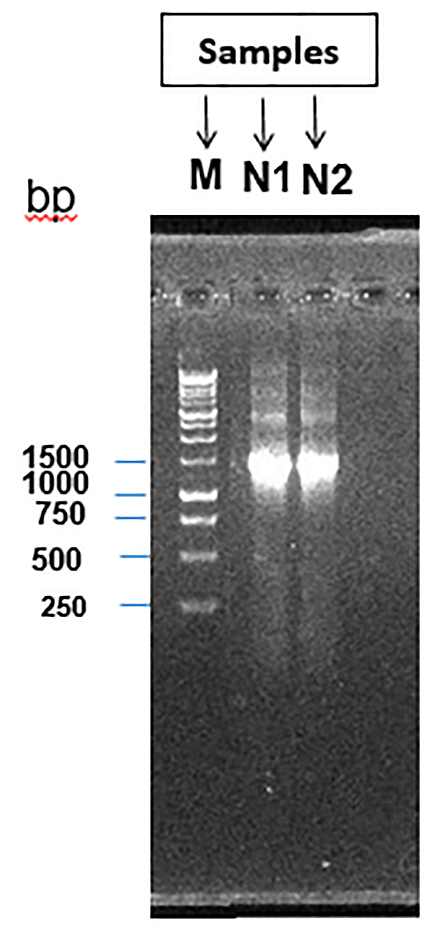


**M= DNA ladder (Marker)**

**N1=*Acinetobacter* sp.**

**N2= *Klebsiella* sp.**

**Fig. S7.** 16s rDNA gene profiles of 27F & 1492R primers generated from two different bacterial species N1 (*Acinetobacter* sp.) and N2 (*Klebsiella* sp.). M denotes 1kb DNA ladder (marker)


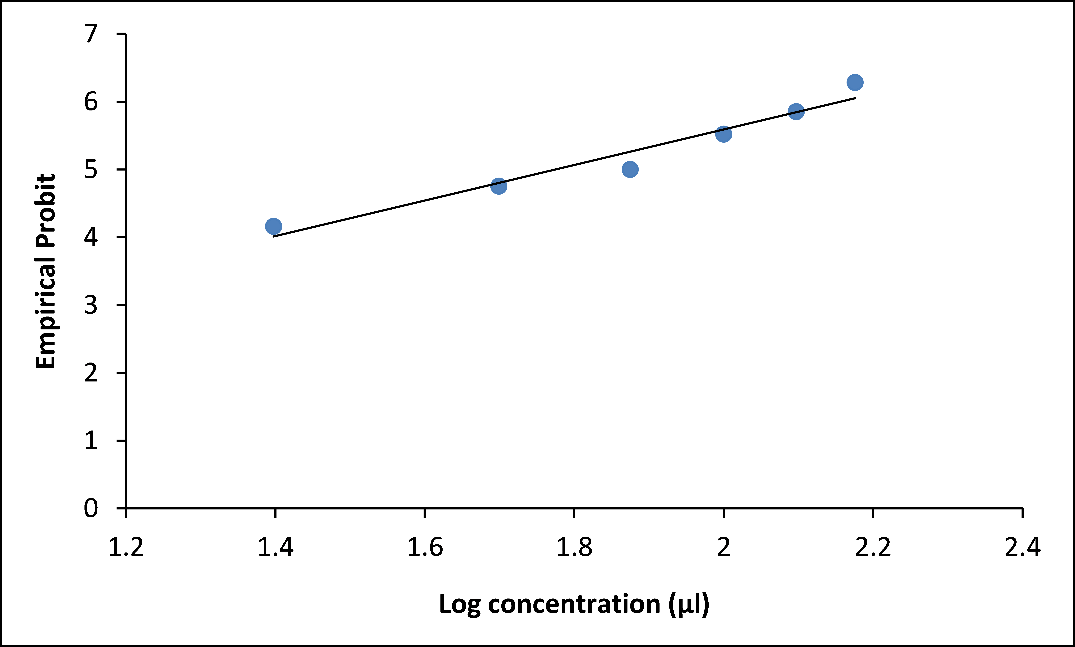


**Fig. S8.** Regression line of log dose of *Acinetobacter* sp. against brine-shrimp nauplii after 24 hours of exposure


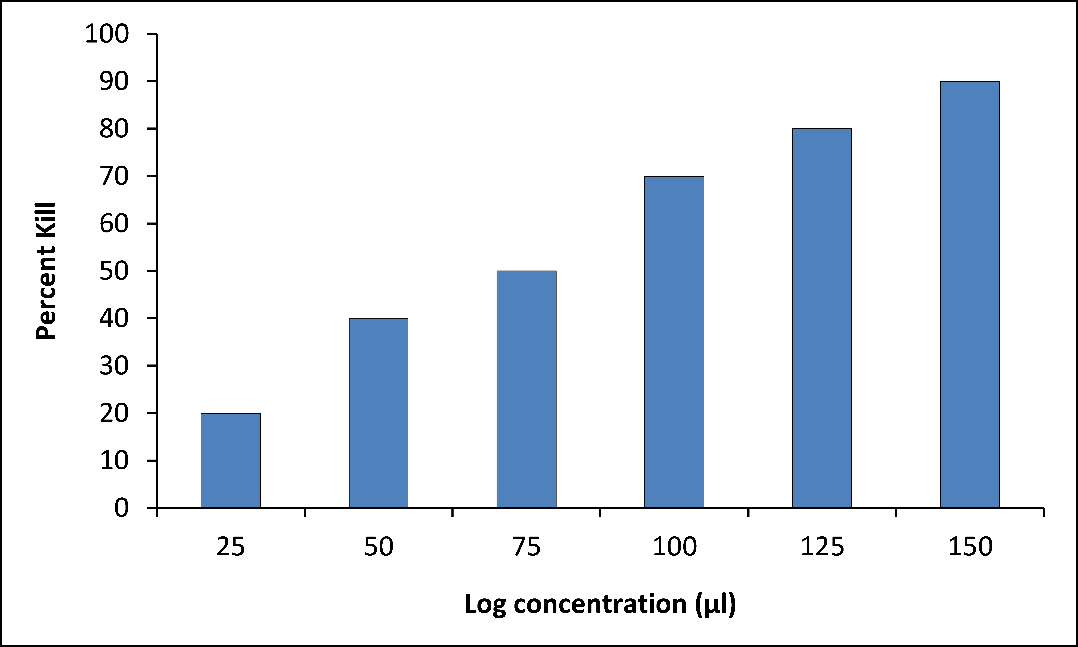


**Fig. S9.** Percent mortality of brine shrimp by *Acinetobacter* sp. after 24 hours of exposure


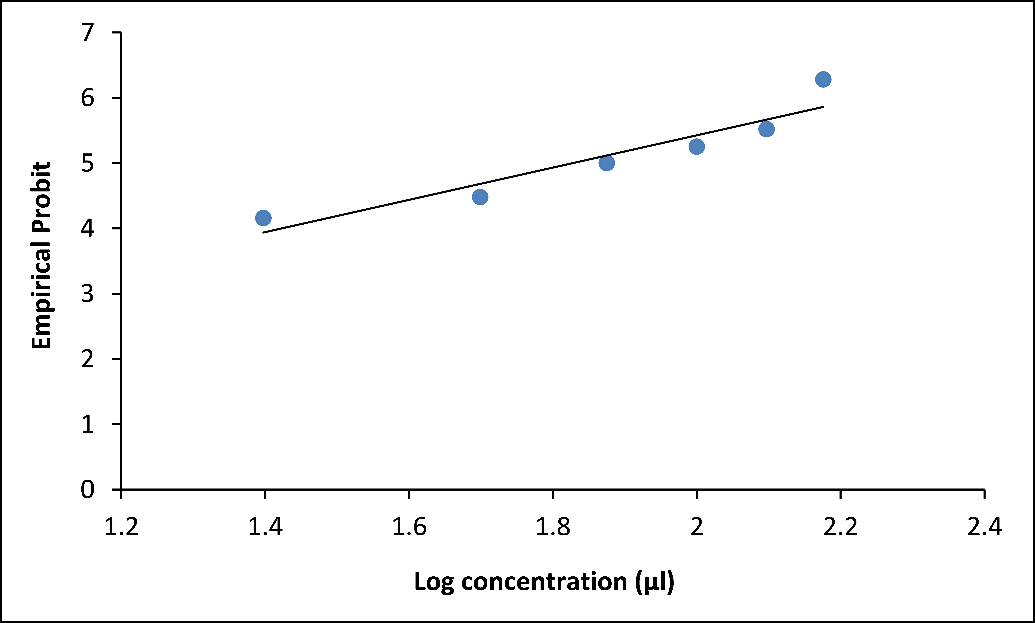


**Fig. S10.** Regression line of log dose of *Klebsiella* sp. against brine-shrimp nauplii after 24 hours of exposure


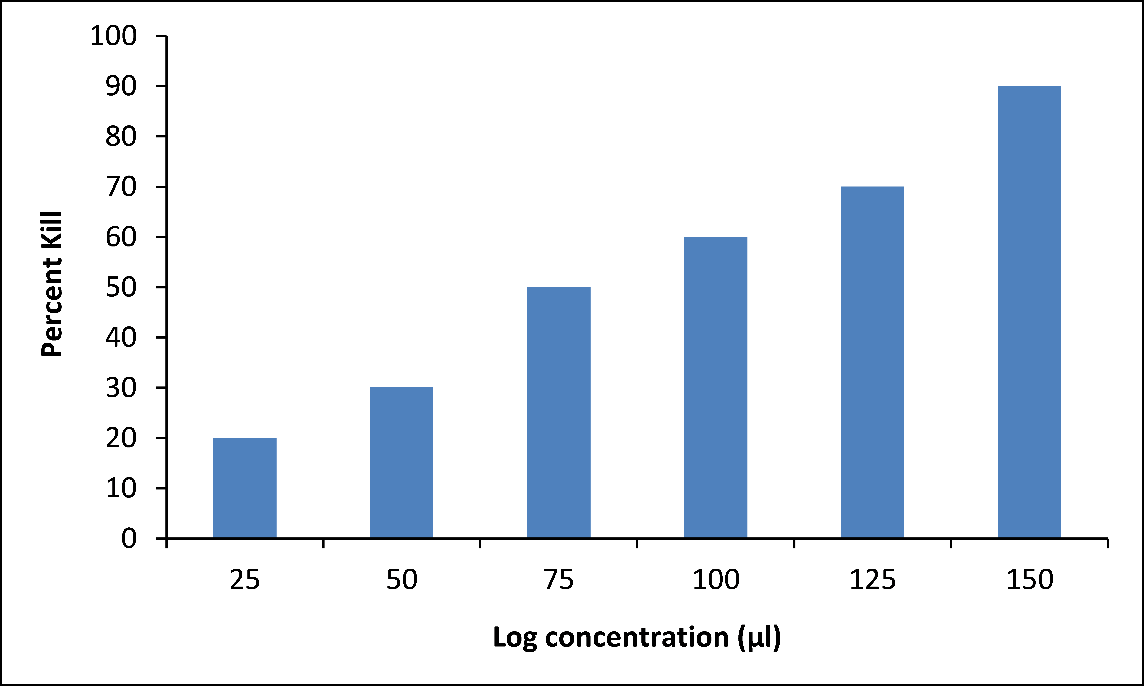


**Fig. S11.** Percent mortality of brine shrimp by *Klebsiella* sp. after 24 hours of exposure

**Table S1** Global and pairwise analysis of similarities (ANOSIM) showing significant dissimilarities in the Isolate A and Isolate B treated *Artemia* at different time intervals compared to controls. P< 0.05 indicates significantly different global ANOSIM tests. Significance levels: 0 ‘***’ 0.001 ‘**’ 0.01 ‘*’ 0.05, ‘.’ 0.1.

| **Categories** | **ANOSIM Test** | | |
| --- | --- | --- | --- |
| **SQRT+Bray-Curtis** | | |
| **Bacterial Treatment** | **R** | **P** | **Sign. Level** |
| Global test for Stationary Phase | 0.646 | 0.001 | *** |
| Global Test for Exponential Phase | 0.52 | 0.002 | ** |
